# Supplementary material
Source: PubMed Central journal article supplement (PMC1559806)
Supplement: rspb20043026s04.pdf [file rspb20043026s04.pdf]

# **ELECTRONIC APPENDIX**

This is the Electronic Appendix to the article

## **Selection strength and hitchhiking around two anti-malarial resistance genes**

by

Denae Nash, Shalini Nair, Mayfong Mayxay, Paul N. Newton,  
Jean-Paul Guthmann, François Nosten and Tim J. C. Anderson

*Proc. R. Soc. B* ([doi:10.1098/rspb.2004.3026](https://doi.org/10.1098/rspb.2004.3026))

Electronic appendices are refereed with the text; however, no attempt is made to impose a uniform editorial style on the electronic appendices.

## SUPPORTING MATERIAL

**Table S1. Primer used to amplify microsatellites on Chromosome 4.** The positions of oligo sequences are shown in the published sequence of strain 3D7 parasites (Gardner *et al.* 2002). Names marked with asterisks indicate those markers used in the construction of the *P. falciparum* genetic map (Su *et al.* 1999). Three oligos are shown for each microsatellite marker. The first two oligos were used in the first round of amplification (for Laos samples only), while the second two were used in the second round of amplification (for samples from both Laos and Thailand). PCR conditions were as described previously (Anderson *et al.* 1999).

| Locus   | Primer Sequences                                                            | Position in Chr 4 |        | Repeat Structure  |                                       | Distance from <i>dhfr</i> (kb) |
|---------|-----------------------------------------------------------------------------|-------------------|--------|-------------------|---------------------------------------|--------------------------------|
|         |                                                                             | start             | end    | (AT) <sub>n</sub> | Other                                 |                                |
| d_217   | ACTACCATATTTATGCCTCT<br>AGAATTTTTAGGGATTAAG<br>TGTGTATCCTTTCTAATATATCG      | 217085            | 217265 | 16                |                                       | -537.32                        |
| d_294   | ACAATAAATAAGGCTCTATCA<br>ACTTTTCGAGTGTCTTGTAG<br>GAACAATATTTTCATATATATAATGC | 294317            | 294498 | 17                |                                       | -460.09                        |
| d_391   | TTTAACACACATATAAGGTACA<br>GATTTTAGTTCTGGTCGTAT<br>TAAAGTGATTGTCATTTTTG      | 391076            | 391211 | 13                |                                       | -363.33                        |
| d_613   | ATGAACGTTCTATATTGAGT<br>TCTTTATACGAAAATGAAAA<br>CATATAGTGAAAAGACTAAAAA      | 613129            | 613332 | 14                |                                       | -141.28                        |
| C4M39*  | AATGGTATGAACGTGATTCA<br>AAAGTAGTCATTGTAATAGC<br>AAGTAGTCATTGTAATAGC         | 665618            | 665777 | 19                | A <sub>29</sub>                       | -88.79                         |
| C4M40*  | GCATTGTGCTTATGTATGAG<br>GTAGCTGTCCGTTTCGAC<br>CAAAAAGAAGAAAAGGGGAAT         | 696730            | 696873 | 14                | (ATTT) <sub>8</sub>                   | -57.68                         |
| d_75_0  | TTAGTGACAGTGAACAGGTA<br>AAATTTTCAAATCCAATTAC<br>ATCCATGTATATCGAGTTCT        | 724795            | 724944 | 14                |                                       | -29.61                         |
| d_100_1 | TTCTACGAATTATTTTTCCA<br>ACAAGTTAAAAGACGAAACA<br>AATAATAGGACACAGAAAATGT      | 749922            | 750119 | 12                |                                       | -4.49                          |
| d_100_4 | TAATATTATCCTTTCTGCAA<br>ACAAAAAGAAAATCATCAAA<br>GTCAATAATTTCTGCATCAT        | 750228            | 750412 | 14                | A <sub>20</sub> , (ATTT) <sub>7</sub> | -4.18                          |
| d_100_8 | ACAGTTATAAGATTAATGCAA<br>ACTGATGAAATTGTAAATGA                               | 750540            | 750739 | 16                |                                       | -3.87                          |
| d_103_4 | ATTGAAACTAGCTCAACAAA                                                        | 753190            | 753404 | 15                |                                       | -1.22                          |

|         |                                                                             |               |               |    |                                     |        |
|---------|-----------------------------------------------------------------------------|---------------|---------------|----|-------------------------------------|--------|
|         | TTATAAGATTCCCATAGACA<br>AAGTGAGTAAATATGAATGTGC                              |               |               |    |                                     |        |
| d_104_5 | ATATTCCAACATTTTCAAGA<br>ATTTTTGCTTTCAACCTTAC<br>TTTTTACTAGCCATTTTTGT        | 754308        | 754479        | 15 |                                     | -0.1   |
| <hr/>   |                                                                             |               |               |    |                                     |        |
| dhfr    |                                                                             | <b>754408</b> | <b>756234</b> |    |                                     |        |
| d_106_5 | TATGAACAAATGATGACAAA<br>ATTCATGTTCAAGTAAAAA                                 | 756254        | 756429        | 16 |                                     | 0.2    |
| d_106_8 | TAAAGAAGGCATAATTTTCA<br>CATTGAGATAAATAAGTGTTC                               | 756649        | 756756        | 17 |                                     | 0.52   |
| d_110_3 | CACATATAAATAAATATATCTCGAA<br>TAAATAACCCAAAATCATGT<br>ACCTCTTGAAGTATCATTTTT  | 760083        | 760284        | 18 | A <sub>32</sub>                     | 4.05   |
| d_112_2 | TTGTTTTTGTTAAGTTGTTT<br>GAATATGACACAAATTAGTAGG<br>TTTTTCCTATCTATCATATTGTT   | 761994        | 762104        | 15 |                                     | 5.87   |
| C3M35*  | GGAAATATATATCATACTTGG<br>TTTTTGGTGTGCGTTATTTTT<br>TTCATGTGTAAATATAATAAAGTGA | 795928        | 796146        | 22 | (ATTT) <sub>9</sub>                 | 39.91  |
| C4M28*  | TTCTACCTATAAGTGTCAAG<br>GGTTAACTAATGCGTATTTAA<br>TGTGAGGCAAAGGGAAAATC       | 805219        | 805398        | 19 | A <sub>20</sub> (ATTT) <sub>6</sub> | 49.16  |
| C4M15*  | GGAATACTCCAAAGGTAATAA<br>GGATATAAAAAATAGGGTTAG<br>TCCCGAAGAAGAAGTTGTCA      | 877111        | 877261        | 21 |                                     | 121.03 |
| d_937   | TATTGGATGTCATATTTCAA<br>GCGTTAAAGCATACTAAAT<br>GATATTTCAAATTGGTTACA         | 937168        | 937326        | 15 |                                     | 181.09 |
| d_994   | ACTTCTAATATATCATGTAGTATGG<br>TCATATATGCAATGAGAAATA<br>ATAGAAATACTTCCTTCTGAT | 994633        | 994779        | 12 | A <sub>15</sub> (AT) <sub>7</sub>   | 238.55 |
| d_1055  | CAAAATAACGTTTTACTTGA<br>CAAAATTGATATATGCACAC<br>TTCATTGTTTTAATTAGCAT        | 1055828       | 1055950       | 16 |                                     | 299.72 |

---

**Table S2. Primer used to amplify microsatellites on Chromosome 4.** The positions of oligo sequences are shown in the published sequence of strain 3D7 parasites (Gardner *et al.* 2002). Names marked with asterisks indicate those markers used in the construction of the *P. falciparum* genetic map (Su *et al.* 1999). Three oligos are shown for each microsatellite marker. The first two oligos were used in the first round of amplification (for Laos samples only), while the second two were used in the second round of amplification (for samples from both Laos and Thailand). PCR conditions were as described previously (Anderson *et al.* 1999).

| Locus      | Primer Sequences                                                             | Position in Chr 7 |        | Repeat Structure |       | Distance from <i>dhfr</i> (kb) |
|------------|------------------------------------------------------------------------------|-------------------|--------|------------------|-------|--------------------------------|
|            |                                                                              | start             | end    | (AT) <i>n</i>    | Other |                                |
| CH7_27663  | TACATATTTTTGGTTTTTCC<br>AATAATTTTGTTAACACATCG<br>AATGTATCTATCCATTTTATACTT    | 27663             | 27991  | 20               |       | -279.9                         |
| CH7_94734  | AGTATTAATTATCACTATCCAATT<br>GATAAAGAAGTCGTTTCATGTT<br>CATATGATAAAGAAGTCGTTTC | 94734             | 94846  | 17               |       | -213.08                        |
| CH7_118715 | GGAAGAAGCCTTAGATAAAA<br>TTTATAAGGCACACATGAAT<br>GTACATCTTATGGAAGAAGC         | 118715            | 118885 | 14               |       | -189.041                       |
| CH7_152697 | ATTTATCTATCGCCTTTGTT<br>TGATAAATCATCTGGAACAT<br>ATGTGTGATAAATCATCTGG         | 152697            | 152898 | 17               |       | -155.028                       |
| CH7_176413 | AATTGTCCAAACAAATAAAA<br>TGATAGGATAAGTTTTTGAA<br>CTCTTAAAATTGTCCAAACA         | 176413            | 176587 | 13               |       | -131.339                       |
| CH7_203615 | AAAAATATAAATTCATGTGC<br>GGATTTATAATATTCAAAGGA<br>TTATTTAAGATGACTTTTGTAAG     | 203615            | 203741 | 20               |       | -104.185                       |
| CH7_228136 | ATTTGTTTTATTTTTCACC<br>AAAAGCTGTCAATTTTAAAT<br>CATTGATCCATTTATGATT           | 228136            | 228236 | 11               |       | -79.69                         |
| CH7_252695 | CGTTTAGTTTTAGAATGCA<br>TTTTATTATGTATACGTGTGT<br>AAGACCGTTTAGTTTTAGAAT        | 252695            | 252821 | 16               |       | -55.105                        |
| CH7_278503 | TATGTACCCTCAAGTAGACC<br>ATTTATTCATTCCTTTTGT<br>TAGGCATATTCCTTTTATT           | 278503            | 278658 | 10               |       | -29.268                        |
| 3E7*       | AAGAATGAAAGTATTTTATAGC<br>CCCCTTCAAAAAGGAAATAACAC<br>TGCGTAAATTTGATGTAAT     | 296911            | 297093 | 15               |       | -10.833                        |

|            |                                                                          |        |        |         |         |
|------------|--------------------------------------------------------------------------|--------|--------|---------|---------|
| CH7_303313 | GTCAATTTTATTTTGTCT<br>ATACAATTTGGGTGAAA<br>GGTGTCAATTTTATTTGTT           | 303313 | 303544 | 11      | -4.382  |
| CH7_304928 | TAAAAAGCACCTTATTCATT<br>AAATCGAATTTATTTATCG<br>AATTTCTACTAGTATCATAAACA   | 304928 | 305112 | 15      | -2.814  |
| pfcr       |                                                                          | 307926 | 311020 |         |         |
| CH7_311610 | AATTCATACTGTGTCAAAGG<br>ACCTATTTATCAAAACACCA<br>TAGAAATGAGAAGAAGCAAA     | 311610 | 311773 | 22      | 0.59    |
| CH7_321409 | CGGTATGATTATAATTTGAGA<br>ACATTTAAGAAAAACCCATT<br>GCTCACATCATTCTAACAT     | 321409 | 321614 | (ATT)12 | 10.389  |
| CH7_334596 | ATCCATACTGCAAAAATAAA<br>TAAATGGAAAGGAGTTTGTA<br>TTAATCCATACTGCAAAAAT     | 334596 | 334788 | 15      | 23.576  |
| CH7_350596 | CACAATCAAATAAAGGAAAG<br>TTTTGTTTGGTACATTTTTC<br>AAACACAATCAAATAAAGGA     | 350596 | 350797 | 11      | 39.576  |
| CH7_389962 | TGTGTTTGTGTATAGACATTTT<br>TGTTTAATGGAATAACAAAAA<br>AATTTGCTACATCCACATT   | 389962 | 390069 | 15      | 78.942  |
| CH7_414109 | TCAGAAATTTTACTTGACC<br>AAAATAACTGTTTTCTTTCT<br>CCATACCATTAATTTGGTT       | 414109 | 415067 | 11      | 103.089 |
| CH7_441903 | ATACCCATGGTTACTACTAAA<br>AGATTGAACGAAAAATATCA<br>ATGCACTGAACAATCTTTAT    | 441903 | 442040 | 11      | 130.883 |
| CH7_465082 | ACGACAAGAAGTAAAACAAA<br>AAAAATAGATAACTAACAATATGC<br>AAAGAACGACAAGAAGTAAA | 465082 | 465246 | 13      | 154.062 |
| CH7_503929 | TCGAAACTAATGAAAAATTG<br>TTTTGGTTATATTACTTGCA<br>GCTCCATTTAATCGAAACT      | 503929 | 504090 | 15      | 192.909 |
| CH7_552849 | TTATGTTTTCATCGTTTTCT<br>TGTCATATTTGTGAAAGTCA<br>TGTGATTATGTTTTGATCG      | 552849 | 553036 | 19      | 241.829 |
| CH7_626325 | AAACAAAAAGGTACACACAC<br>ACTGTTTCAGGTAATACACG<br>TCCCTTCTAAAAAGTTTACAT    | 626325 | 626544 | 13      | 315.305 |

|            |                                                                      |        |        |    |         |
|------------|----------------------------------------------------------------------|--------|--------|----|---------|
| CH7_699177 | CTCTTTTTCTTTCTCTTTT<br>ACGACGGTATGAAATAAATA<br>TTC AATGGTAATAAATCGAG | 699177 | 699415 | 21 | 388.157 |
| CH7_779523 | TTGTAATGTTGTCATGTTGT<br>CCGTTTATATATTCAGCTTG<br>TGATATTTTAAGGAATCGAC | 779523 | 779693 | 10 | 468.503 |

---

## REFERENCES

- Anderson, T. J., Su X. Z., Bockarie M., Lagog M. & Day K. P. (1999) Twelve microsatellite markers for characterization of *Plasmodium falciparum* from finger-prick blood samples. *Parasitology* **119** (Pt 2), 113-125.
- Gardner, M. J., Hall N., Fung E., White O., Berriman M., Hyman R. W., Carlton J. M., Pain A., Nelson K. E., Bowman S., Paulsen I. T., James K., Eisen J. A., Rutherford K., Salzberg S. L., Craig A., Kyes S., Chan M. S., Nene V., Shallom S. J., Suh B., Peterson J., Angiuoli S., Pertea M., Allen J., Selengut J., Haft D., Mather M. W., Vaidya A. B., Martin D. M., Fairlamb A. H., Fraunholz M. J., Roos D. S., Ralph S. A., McFadden G. I., Cummings L. M., Subramanian G. M., Mungall C., Venter J. C., Carucci D. J., Hoffman S. L., Newbold C., Davis R. W., Fraser C. M. & Barrell B. (2002) Genome sequence of the human malaria parasite *Plasmodium falciparum*. *Nature* **419**, 498-511.
- Su, X., Ferdig M. T., Huang Y., Huynh C. Q., Liu A., You J., Wootton J. C. & Wellems T. E. (1999) A genetic map and recombination parameters of the human malaria parasite *Plasmodium falciparum*. *Science* **286**, 1351-1353.
